## Enhanced insular connectivity with speech sensorimotor regions in trained singers – a resting-state fMRI study

Zamorano, A.M.<sup>1,4</sup>, Zatorre R.J.<sup>5,6</sup>, Vuust, P.<sup>3</sup>, Friberg, A.<sup>7</sup>, Birbaumer, N.<sup>1,2</sup>, Kleber, B.<sup>1,3</sup>

(1) *Institute for Medical Psychology and Behavioral Neurobiology, University of Tübingen, Germany*

(2) *Wyss Center for Bio and Neuroengineering, Chenin de Mines 9, 1202, Geneva, Switzerland*

(3) *Center for Music in the Brain, Department of Clinical Medicine, Aarhus University, & The Royal Academy of Music Aarhus/Aalborg, Denmark*

(4) *Research Institute on Health Sciences, University of Balearic Islands, Palma de Mallorca, Spain*

(5) *McGill University–Montreal Neurological Institute, Neuropsychology and Cognitive Neuroscience, Montreal, Canada*

(6) *International Laboratory for Brain, Music and Sound research (BRAMS), Montreal, Canada*

(7) *Speech, Music and Hearing, KTH Royal Institute of Technology, Stockholm, Sweden*

### Abstract

The insula contributes to the detection and integration of salient events during goal-directed behavior and facilitates the interaction between motor, multisensory, and cognitive networks. Task-fMRI studies have suggested that experience with singing can enhance access to these resources. However, the long-term effects of vocal motor training on insula-based networks are currently unknown. In this study, we used resting-state fMRI to explore experience-dependent differences in insula co-activation patterns between conservatory-trained singers and non-singers. We found enhanced insula connectivity in singers compared to non-singers with constituents of the speech sensorimotor network, including the cerebellum (lobule VI, crus 2), primary somatosensory cortex, the parietal lobes, and the thalamus. Moreover, accumulated singing training correlated positively with increased co-activation in bilateral primary sensorimotor cortices in the somatotopic representations of the larynx (left dorsal anterior insula, dAI) and the diaphragm (bilateral dAI)—crucial regions for motorcortical control of complex vocalizations—together with the thalamus (bilateral posterior insula/left dAI) and the left putamen (left dAI). The results of this study support the view that the insula plays a central role in the experience-dependent modulation of sensory integration within the vocal motor system, possibly by optimizing conscious and non-conscious aspects of salience processing associated with singing-related bodily signals.

## INTRODUCTION

Research over the last two decades has provided compelling evidence that the extensive practice and performance of high-level motor, sensory, and multimodal integration skills required for mastering a musical instrument can have profound effects on the functional and structural organization of the brain (Elmer et al., 2016; Klein et al., 2016; Schlaug, 2015; Vuust et al., 2014; Zatorre, 2013). Musical training has therefore been widely used as a framework for studying human neuroplasticity (Munte et al., 2002), demonstrating that adaptive changes in the brain can be linked to the rehearsed action, encompass quantifiable behavioral correlates (i.e., improved performance), occur in response to short and long-term training, while being pronounced when formal training began during a sensitive period before the age of seven years (for review, see Herholz and Zatorre, 2012). Trained singers, on the other hand, have rarely been studied in this context. They differ from instrumentalists as they (i) commence with formal training routinely later (Kleber et al., 2016; Penhune, 2011; Schirmer-Mokwa et al., 2015) and (ii) optimize a motor system for music production that has already undergone substantial maturation during speech and language development, and informal singing experience (Dalla Bella et al., 2007; Skeide and Friederici, 2016; Smith, 2006; Weiss-Croft and Baldeweg, 2015). As professional singers still require a large amount of deliberate practice to meet the musically prescribed acoustic standards, the current study used singers as a model for experience-dependent neuroplasticity within the speech-motor system (Kleber and Zarate, 2014; Zarate, 2013).

The neural pathways underlying basic vocalizations have been demonstrated by research in primates (Jurgens, 2002, 2009), whereas higher-level aspects of vocal motor production have been studied in the context of human speech (Price, 2012). Together, they revealed a hierarchically organized structure-function relationship in which basic vocal pattern are generated in the brain stem and the periaqueductal gray, which interact with limbic regions,

whereas volitional sensorimotor control of complex vocalizations takes place in the cortex (Hage and Nieder, 2016; Simonyan and Horwitz, 2011). The presumed interactions between these regions are described and formalized by neurocomputational models in the context of speech motor processes (Bouchard et al., 2013; Guenther, 2016; Guenther and Hickok, 2015; Hickok, 2017; Houde and Chang, 2015; Parrell et al., 2017; Rodriguez-Fornells et al., 2009; Tian and Poeppel, 2010). Specifically, the DIVA (Directions Into Velocities of Articulators) model suggests that dorsal stream speech-motor control involve a sensory integration interface encompassing auditory, ventral somatosensory, and inferior parietal cortices, which interact via the arcuate fasciculus with the articulatory motor network located in ventral primary- and pre-motor regions (Guenther and Hickok, 2015). Moreover, cortico-thalamic loops including the supplementary motor area, the basal ganglia, and the cerebellum contribute to feedback and feedforward transformations supporting vocalizations (Dick et al., 2014; Hertrich et al., 2016).

The insular cortex is not typically a major player in these models but has long been considered to contribute to motor aspects of speech production (Dronkers, 1996; Price, 2000; Riecker et al., 2005), based on its involvement in vocalization-related autonomic and perceptual-motor processes (Craig, 2002, 2009), and its structural connectivity with constituents of the dorsal sensorimotor stream (Augustine, 1996; Eickhoff et al., 2009; Hickok, 2017; Remedios et al., 2009; Riecker et al., 2008). In a general context, the insular cortex is functionally and structurally connected to a vast number of cortical and subcortical brain regions subserving sensory, emotional, motivational and cognitive processes (Gogolla, 2017; Nomi et al., 2018). As an actively participating integration hub within these networks, its multifaceted functional roles range from conscious and non-conscious integration of bodily information (Craig, 2002, 2009; Critchley et al., 2004; Karnath and Baier, 2010; Olausson et al., 2002), the preservation of homeostatic states in autonomic systems that are critical to body regulation (Gu and FitzGerald, 2014; Strigo and Craig, 2016), to salience detection and valence

assessment of incoming sensory inputs (Berret et al., 2019; Singer et al., 2009), as well as the coordination of large-scale network dynamics associated with higher-level cognitive processes (Menon and Uddin, 2010; Seeley et al., 2007; Uddin, 2015). Speech specific clinical and functional imaging data suggest a bilateral engagement for linguistic processes and a left-hemispheric dominance for non-linguistic aspects of speech-related perceptual and motor processes in the dorsal anterior insula (Ackermann and Riecker, 2010; Oh et al., 2014). Singing, on the other hand, shows a right-hemispheric dominance for perceptual and motor processes (Ackermann and Riecker, 2004; Jeffries et al., 2003; Riecker et al., 2000), possibly related to the processing of prosodic or melodic elements of vocalizations (Oh et al., 2014). This notion is supported by neuroimaging studies with classically trained singers, indicating a role of the right anterior insula in the stabilization of vocal pitch patterns during sensory feedback perturbations (Kleber et al., 2017; Kleber et al., 2013). However, long-term effects of vocal sensorimotor training on insula-based networks in singers are currently unknown.

The current study addressed this question by employing resting-state (rs-)fMRI to quantify experience-dependent differences in large-scale brain networks between trained singers and non-singers, following the notion that rs-fMRI reflects the record of repeated task-dependent synchronized activation between brain regions (Guerra-Carrillo et al., 2014). Specifically, we used a seed-based approach to explore temporally correlated spontaneous fluctuations of blood oxygen level-dependent (BOLD) between a priori defined regions of interests (ROI) with all other brain regions (Biswal et al., 1995; Fox and Greicius, 2010; Fox and Raichle, 2007). Given the insula's involvement in the brain's language and speech system (Ardila et al., 2014) and in the coordination of large-scale brain networks (Uddin et al., 2014), we have chosen insula ROIs following a tripartite subdivision model (Deen et al., 2011). This model is based on structural and functional co-activation patterns across task domains, which suggest both unique and overlapping functional profiles encompassing the posterior insula (PI), the dorsal anterior insula

(dAI), and the ventral anterior insula (vAI) (Deen et al., 2011; Nomi et al., 2018; Uddin et al., 2014). We expected to find enhanced insula connectivity in singers compared to non-singers (Kleber et al., 2017; Kleber et al., 2013), specifically between the AI with regions of the dorsal sensorimotor speech stream involved in vocal tract coordination, analogous to task-related findings with musicians trained in playing an instrument (Zamorano et al., 2017). A high level of task-related structure function specificity would provide converging evidence for a central involvement of the insula in vocal motor control and may furthermore help delineating experience-dependent changes within sensory integration networks.

## **METHODS**

### **Participants**

A total of twenty-five right-handed subjects without reported history of neurological or psychiatric disease participated in this study. Participants were subdivided in two groups based on their expertise in singing. Twelve professional singers (6 female,  $32.7 \pm 8.6$  yrs) with music conservatory education participated in this study. Trained singers took their first formal singing lesson at the average age of 16 years ( $\pm 6.7$ ) and accumulated an average of 12957 hours (range: 1456-38220) of singing experience. Thirteen non-singers (6 female,  $28.1 \pm 7.3$  yrs) participated from the University of Tübingen medical school. Neither of them received singing training nor reported involvement in occasional singing activities (e.g., choirs, informal rock bands etc.). All participants were informed about the details of the study and provided written consent. The study was conducted under a protocol approved by the research ethics board of the University of Tübingen.

### **Image Acquisition**

Magnetic resonance imaging was performed using a 3-Tesla whole body MRI Scanner (Siemens MAGNETOM Prisma™ 3T, Erlangen, Germany). For each subject, 225 echo-planar volumes were acquired (repetition time, 2000 ms; echo time, 30 milliseconds; matrix

dimensions, 64 x 64; field of view, 1260 mm; 30 transversal slices; slice thickness, 4 mm; flip angle, 90 degrees) over a period of 7.5 minutes with the eyes closed. The structural imaging data consisted of T1-weighted images (mprage, repetition time, 2300 milliseconds; echo time, 4.18 milliseconds; matrix dimensions, 512 x 512; field of view, 256 x 256 mm; 176 slices; slice thickness, 1 mm; flip angle, 9 degrees).

### **Pitch-matching accuracy**

Participants' ability to sing on pitch was quantified using a pitch-matching paradigm. Musical intervals are presented via headphones and participants are prompted to immediately reproduce the pitch height of each tone with their singing voice. A total of 36 musical intervals were presented (17 ascending, 15 descending, and four same tone) using Max/MSP software to control the experiment (Cycling 74, San Francisco, California, USA). The first tone always started at the fundamental frequency of 311.13 Hz for females (D#4 in musical notation) and 155.565 Hz for males (D#3 in musical notation). Each tone was played with a duration of 900-ms, separated by a 200-ms gap. The second tone differed from the first by a value between zero and  $\pm$  nine semitones (one semitone corresponds to a frequency ratio of 1.0595 or 100 cents). Vocal performance was recorded and stored in wave format for offline automated analyses of pitch-matching accuracy.

### **Neuroimaging data preprocessing**

Following our previous approach (Zamorano et al., 2017; Zamorano et al., 2019), functional images were preprocessed with the Data Processing Assistant for Resting-State fMRI (DPARSF; Chao-Gan and Yu-Feng, 2010), based on the Statistical Parametric Mapping software package (SPM8; <http://www.fil.ion.ucl.ac.uk/spm>) and the Data Processing & Analysis of Brain Imaging toolbox (DPABI; <http://rfmri.org/DPABI> DPARSF\_V3.1\_141101). The first 10 volumes from each data set were discarded prior to preprocessing. Following slice-time correction and co-registration, gray and white matter were segmented from co-registered

T1 images using the unified segmentation model (Ashburner and Friston, 2005). The resulting parameter file was used to normalize the functional images (3mm<sup>3</sup> voxel size) to standard Montreal Neurological Institute (MNI) stereotactic space, which were subsequently smoothed with an isotropic Gaussian kernel (FWHM: 6mm<sup>3</sup>). Nuisance regression parameters included white matter, CSF, and the six head motion parameters. WM and CSF masks were generated using SPM's tissue probability maps (empirical thresholds: 90 % for WM mask and 70 % for CSF mask). No global signal regression was performed to avoid introducing distortions of BOLD signal (Murphy et al., 2009). Head motion was below 2.0 mm maximum displacement or 2.0° of any angular motion across all participants. A temporal filter (0.006–0.1 Hz) was applied to reduce low frequency drifts and high frequency physiological noise.

### **Functional connectivity analysis**

Statistical analyses were performed in SPM8 to assess voxel-wise connectivity maps of posterior, ventral anterior and dorsal anterior insula ROIs in each hemisphere. The six insula ROIs consisted of parcellated insular subdivisions (posterior, PI; dorsal anterior, dAI; and ventral anterior insula, vAI) in MNI stereotactic space based on the clustering of functional connectivity patterns during resting state. These template images were kindly provided by Deen and colleagues (2011).

First, the main connectivity patterns across participants (N=25) were determined by entering z-transformed connectivity maps into one-sample t-tests for each insula ROI (Figure 1). Significance threshold for voxel-wise statistics was set to  $p < 0.05$  familywise error corrected (FWER), in order to validate the results against previously published patterns (Deen et al., 2011; Uddin et al., 2014).

Subsequently, voxel-wise differences between insula-connectivity maps were computed between singers and non-singers using independent two-sample t-tests for each insula ROI. A cluster-extent based thresholding method was employed to increase sensitivity for detecting

true activations in studies with moderate sample sizes (Friston et al., 1994; Smith and Nichols, 2009; Woo et al., 2014). This method accounts for the fact that individual voxel activations are not independent of the activations of their neighboring voxels in spatially smoothed data (Friston et al., 2000; Heller et al., 2006; Wager et al., 2007) and hence used to effectively reduce the possibility of obtaining false positive clusters while improving the degree of confidence in inferences about specific voxels (Woo et al., 2014).

Monte Carlo simulation was as implemented in DPABI's instantiation (Song et al., 2011; Yan et al., 2016) of AlphaSim (Cox, 1996) was used in combination with the DPABI gray matter mask to determine cluster-extent thresholds at  $P < 0.05$  FWER correction for multiple comparisons. Following the recommendations for cluster-extent thresholding in fMRI analyses, a stringent primary voxel-level threshold of  $P < 0.0001$  was applied using smoothness estimation based on the spatial correlation across voxels to avoid inaccurate FWER correction (Woo et al., 2014). Clusters surviving the FWER probability threshold were used for statistical inference. T-values of significantly activated peak-voxels within clusters are presented as MNI coordinates. Effect sizes using Cohen's  $d$  ( $d = 2t / \sqrt{df}$ ) were computed and posteriorly adjusted [unbiased Cohen's  $d$ ;  $d_{unbiased} = d (1 - (3 / 4df - 1))$ ] to control for overestimation of the effect size due to the moderate sample size (Cohen, 2013).

The Automated Anatomical Labeling atlas of Tzourio-Mazoyer (aal, Tzourio-Mazoyer et al., 2002) was used to determine anatomical regions. For regions already cytoarchitectonically mapped, we used the Anatomy Toolbox (Eickhoff et al., 2005).

### **Regression analysis**

Two regression analyses were performed in SPM8 to correlate insula ROI connectivity maps with (i) pitch-matching accuracy across all participants and (ii) the accumulated musical training in trained singers. Cluster extent FWER correction was applied as detailed above.



## RESULTS

### **Voxel-wise functional connectivity of insula subdivisions**

#### *Main connectivity patterns across all participants*

Whole-brain connectivity of PI, dAI, and vAI (left and right, respectively) across participants are shown in Figure 1. The resulting connectivity patterns were consistent with those reported earlier (Cauda et al., 2011; Deen et al., 2011; Uddin et al., 2014).

The *posterior insula* (PI) connectivity pattern was strongly centered on regions involved in sensory and motor processes, including the bilateral insulae and adjacent operculae, sensorimotor (S1, S2, and M1) and pre-motor cortices, the supplementary and pre-supplementary motor area (SMA and pre-SMA), posterior and mid cingulate cortex (PCC and MCC), the parietal lobe (supramarginal gyrus, superior and inferior parietal gyrus, and the precuneus), the temporal lobe (superior temporal, Heschl's, and fusiform gyrus), the inferior frontal gyrus (Broca's area), occipital lobe (calcarine, lingual, and cuneus), and the cerebellum.

The *dorsal anterior insula* (dAI) connectivity pattern was centered on the bilateral insulae and both adjacent rolandic and frontal opercula, the primary and secondary somatosensory regions (S1 and S2), the motor cortices (primary, pre-motor, and SMA); the occipital lobe (calcarine, lingual, and cuneus); the temporal and parietal lobes (superior temporal gyrus, Heschl's and fusiform gyrus, temporal pole; supramarginal, superior and inferior parietal gyrus, and the precuneus), dorsolateral prefrontal cortex (DLPFC) and inferior frontal cortex, cingulate cortex (posterior, PCC; middle, MCC, and anterior, ACC), as well as the cerebellum.

The *ventral anterior insula* (vAI) connectivity pattern was centered on the bilateral insulae and adjacent rolandic and frontal operculae, the frontal lobe (DLPFC, inferior frontal gyrus, IFG) including frontal limbic cortices (ventro anterior prefrontal cortex, VAPFC; orbitofrontal gyrus, OFC), cingulate cortex (ACC and MCC), SMA and pre-SMA, temporal

cortex (e.g., Heschl's gyrus, temporal pole, superior, middle and inferior temporal gyrus), and the parietal lobe (supramarginal and angular gyrus, precuneus).

Subcortically, all three insula sub-regions showed co-variation patterns with the basal ganglia (putamen, pallidum and caudate) and the thalamus.

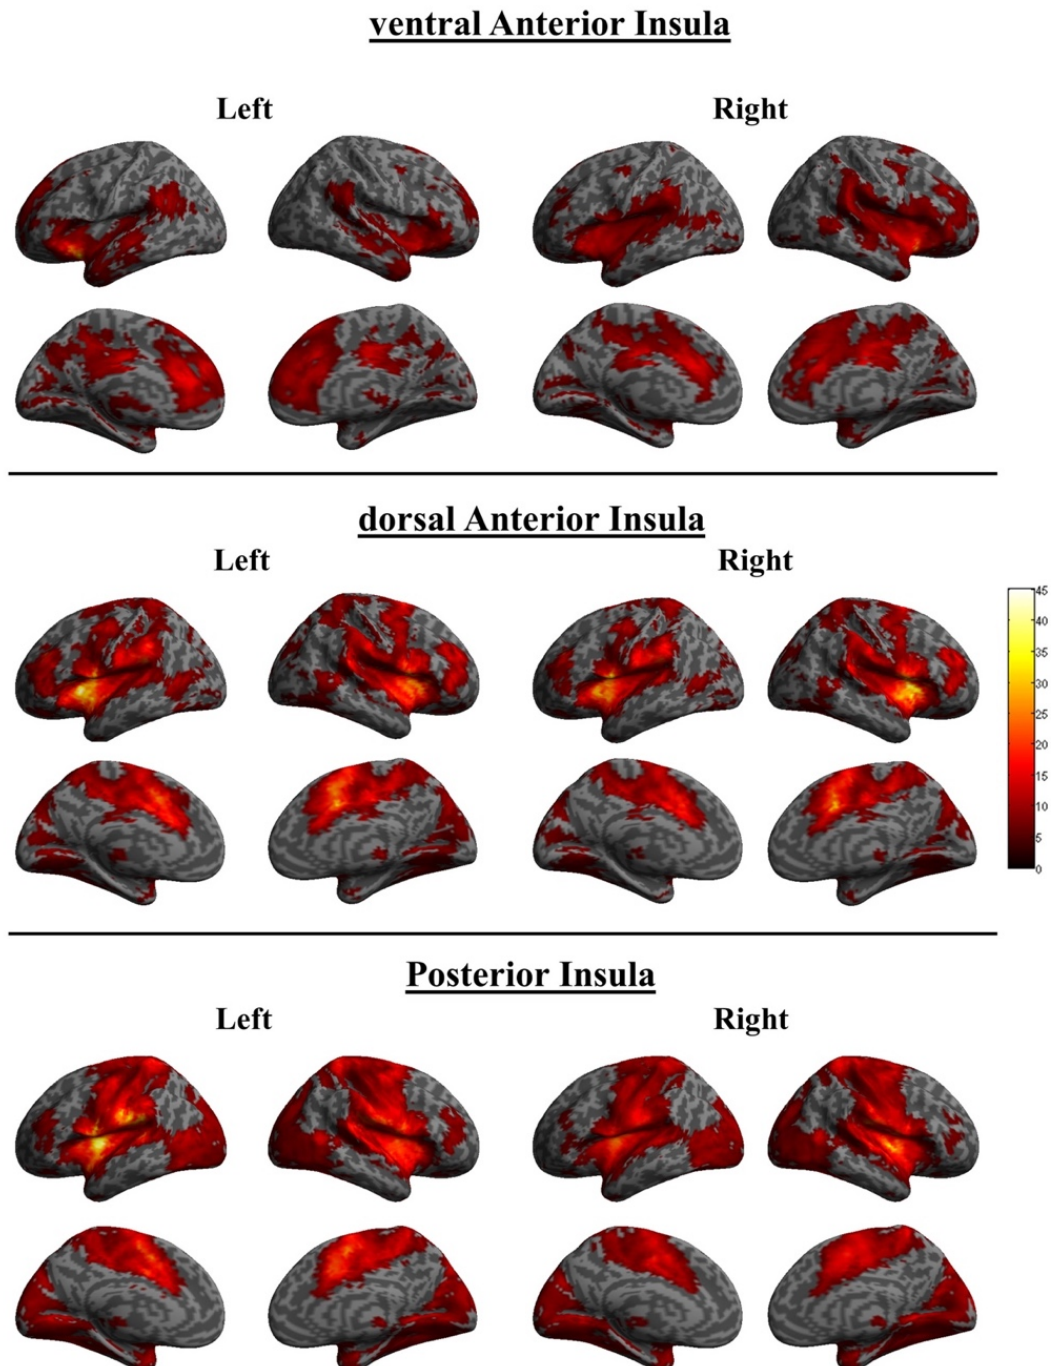

Figure 1: Main patterns of functional connectivity across all participants for ventral anterior insula (vAI), dorsal anterior insula (dAI), and posterior insula (PI) subdivisions. Significance thresholds were set at  $P < 0.05$ , familywise error (FWE) corrected. Connectivity maps for left hemisphere seeds are shown on the left; maps for right hemisphere seeds are on the right.

## **Differences in insula connectivity between trained singers and non-singers**

T-contrasts of connectivity maps between singers and non-singers revealed increased functional connectivity for each insula subdivision (Figure 2 and Table 1). Reversed comparisons yielded no significant differences.

The **left and right PI** (Figure 2A and Table 1) showed increased functional connectivity with lobule VI of the cerebellum.

The **left dAI** (Figure 2B, Table 1) showed increased functional connectivity with bilateral inferior parietal and primary somatosensory cortex, the cerebellum (lobule VI) and the thalamus. The **right dAI** showed increased functional connectivity with the cerebellum (lobule VI and Crus 2) and the right S1. Connectivity with the right inferior frontal gyrus failed to reach significance (Broca's homologue, Area 45).

The **left vAI** (Figure 2C, Table 1) showed increased functional connectivity with the left superior and inferior parietal cortex. The **right vAI** did not reveal significant differences.

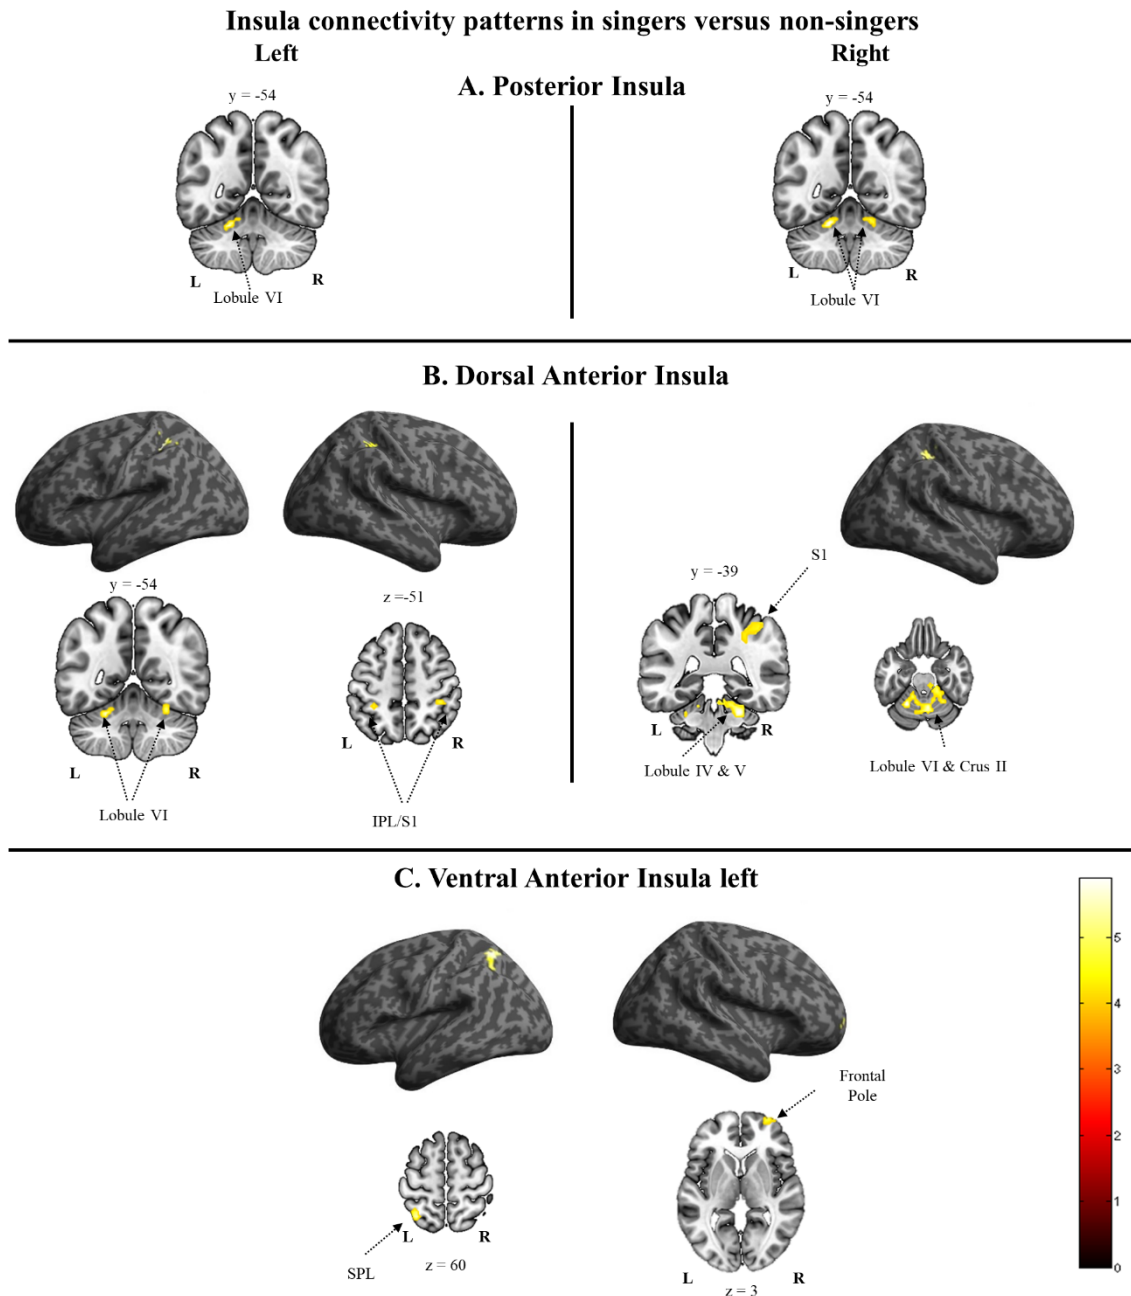

Figure 2: T-maps showing significant group differences in functional insula connectivity during resting-state. Significance thresholds for between-group differences were set at  $p > 0.05$  (FWER), using a cluster-extent based thresholding method. Detailed information is provided in Table 1. Abbreviations: IPL, inferior parietal lobe; SPL, superior parietal lobe; S1, primary somatosensory cortex; IV-VI and Crus II, cerebellar lobules.

**Table 1: Regions with increased insula connectivity in singers compared to non-singers**

| Seed                           | Left Insula         |                 |                 |          |          |          |          | Right Insula           |              |                 |          |      |      |          |                        |
|--------------------------------|---------------------|-----------------|-----------------|----------|----------|----------|----------|------------------------|--------------|-----------------|----------|------|------|----------|------------------------|
|                                | Co-activated region | Cluster size    | MNI coordinates |          |          |          | <i>t</i> | <i>d<sub>unb</sub></i> | Cluster size | MNI coordinates |          |      |      | <i>t</i> | <i>d<sub>unb</sub></i> |
|                                |                     |                 | <i>x</i>        | <i>y</i> | <i>z</i> | <i>x</i> |          |                        |              | <i>y</i>        | <i>z</i> |      |      |          |                        |
| <b>Posterior Insula</b>        |                     |                 |                 |          |          |          |          |                        |              |                 |          |      |      |          |                        |
| <i>Cerebellum</i>              |                     |                 |                 |          |          |          |          |                        |              |                 |          |      |      |          |                        |
| Lobule VI                      | L                   | 31              | -21             | -54      | -24      | 5.15     | 2.03     | 30                     | -18          | -54             | -21      | 5.69 | 2.24 |          |                        |
|                                | R                   | -               | -               | -        | -        | -        | -        | 38                     | 18           | -60             | -18      | 4.62 | 1.82 |          |                        |
| <b>Dorsal Anterior Insula</b>  |                     |                 |                 |          |          |          |          |                        |              |                 |          |      |      |          |                        |
| <i>Parietal</i>                |                     |                 |                 |          |          |          |          |                        |              |                 |          |      |      |          |                        |
| IPL                            | L                   | 36 <sup>a</sup> | -33             | -39      | 39       | 4.61     | 1.82     | -                      | -            | -               | -        | -    | -    |          |                        |
| IPL ( <i>hIP3</i> )            | R                   | 34 <sup>b</sup> | 30              | -39      | 42       | 3.67     | 1.45     | -                      | -            | -               | -        | -    | -    |          |                        |
| <i>Sensorimotor</i>            |                     |                 |                 |          |          |          |          |                        |              |                 |          |      |      |          |                        |
| S1 ( <i>Area 2</i> )           | L                   | 36 <sup>a</sup> | -33             | -42      | 54       | 4.01     | 1.58     | -                      | -            | -               | -        | -    | -    |          |                        |
| S1 ( <i>Area 2</i> )           | R                   | 34 <sup>b</sup> | 39              | -36      | 51       | 4.20     | 1.66     | 47 <sup>a</sup>        | 42           | -39             | 51       | 4.03 | 1.59 |          |                        |
| S1 ( <i>Area 2</i> )           | R                   | -               | -               | -        | -        | -        | -        | 47 <sup>a</sup>        | 33           | -39             | 48       | 3.86 | 1.52 |          |                        |
| <i>Cerebellum</i>              |                     |                 |                 |          |          |          |          |                        |              |                 |          |      |      |          |                        |
| Lobule VI                      | R                   | 33              | 21              | -60      | -15      | 4.52     | 1.78     | -                      | -            | -               | -        | -    | -    |          |                        |
| Lobule IV & V                  | R                   | -               | -               | -        | -        | -        | -        | 420 <sup>a</sup>       | 24           | -39             | -30      | 5.41 | 2.13 |          |                        |
| Lobule VI                      | L                   | -               | -               | -        | -        | -        | -        | 420 <sup>a</sup>       | -24          | -57             | -24      | 5.29 | 2.09 |          |                        |
| Crus 2                         | L                   | -               | -               | -        | -        | -        | -        | 38                     | -42          | -81             | -48      | 4.96 | 1.96 |          |                        |
| <b>Ventral Anterior Insula</b> |                     |                 |                 |          |          |          |          |                        |              |                 |          |      |      |          |                        |
| <i>Parietal</i>                |                     |                 |                 |          |          |          |          |                        |              |                 |          |      |      |          |                        |
| SPL ( <i>7A</i> )              | L                   | 76 <sup>a</sup> | -33             | -60      | 60       | 4.64     | 1.83     | -                      | -            | -               | -        | -    | -    |          |                        |
| IPL ( <i>hIP3</i> )            | L                   | 76 <sup>a</sup> | -27             | -57      | 45       | 4.05     | 1.60     | -                      | -            | -               | -        | -    | -    |          |                        |
| <i>Frontal</i>                 |                     |                 |                 |          |          |          |          |                        |              |                 |          |      |      |          |                        |
| SFG ( <i>Fp1</i> )             | R                   | 34 <sup>a</sup> | 30              | 66       | 3        | 4.19     | 1.65     | -                      | -            | -               | -        | -    | -    |          |                        |
|                                | R                   | 34 <sup>a</sup> | 27              | 66       | 12       | 3.99     | 1.57     | -                      | -            | -               | -        | -    | -    |          |                        |

MNI coordinates and local maxima of whole-brain differences (t-contrasts) in insula-based network connectivity during resting state in singers compared to non-singers. Only results surviving a cluster-extent based threshold of  $p < 0.05$  (FWER correction) are shown. T-values of significantly activated peak-voxels refer to MNI coordinates (<sup>a</sup> = same cluster). Brodmann Areas (BA) labeling was performed using the Automatic Anatomic Labeling toolbox (AAL; 2002). Probabilistic cytoarchitectonic maps for structure–function relationships in standard reference space (in brackets) were assigned using the Anatomy Toolbox (Eickhoff et al., 2005). Abbreviations: *d<sub>unb</sub>*, effect size as unbiased Cohen's *d* (Cohen, 2013); S1, primary somatosensory cortex; IPL, inferior parietal lobe; SPL, superior parietal lobe; IFG, inferior frontal gyrus; SFG, superior frontal gyrus.

## Regression Results

Multiple regression analyses were performed to determine correlations between insula ROI connectivity maps and two behavioral variables: (i) pitch-matching accuracy and (ii) accumulated singing training (Table 2).

Pitch-matching accuracy across all participants revealed no significant correlations with insula connectivity maps.

Accumulated musical training in trained singers revealed significant correlations with insula connectivity maps in the following regions (Figure 3, Table 2):

The **left** and **right PI** connectivity maps (Figure 3A) showed a positive correlation with accumulated training in the thalamus.

The **left dAI** maps showed positive correlations with accumulated training in the bilateral representation of the larynx and the diaphragm, both within primary motor and primary somatosensory cortices, as well as in the bilateral thalamus and the left putamen. The **right dAI** maps showed positive correlations with accumulated training in the bilateral representation of the diaphragm within primary motor and primary somatosensory cortex (Figure 3B).

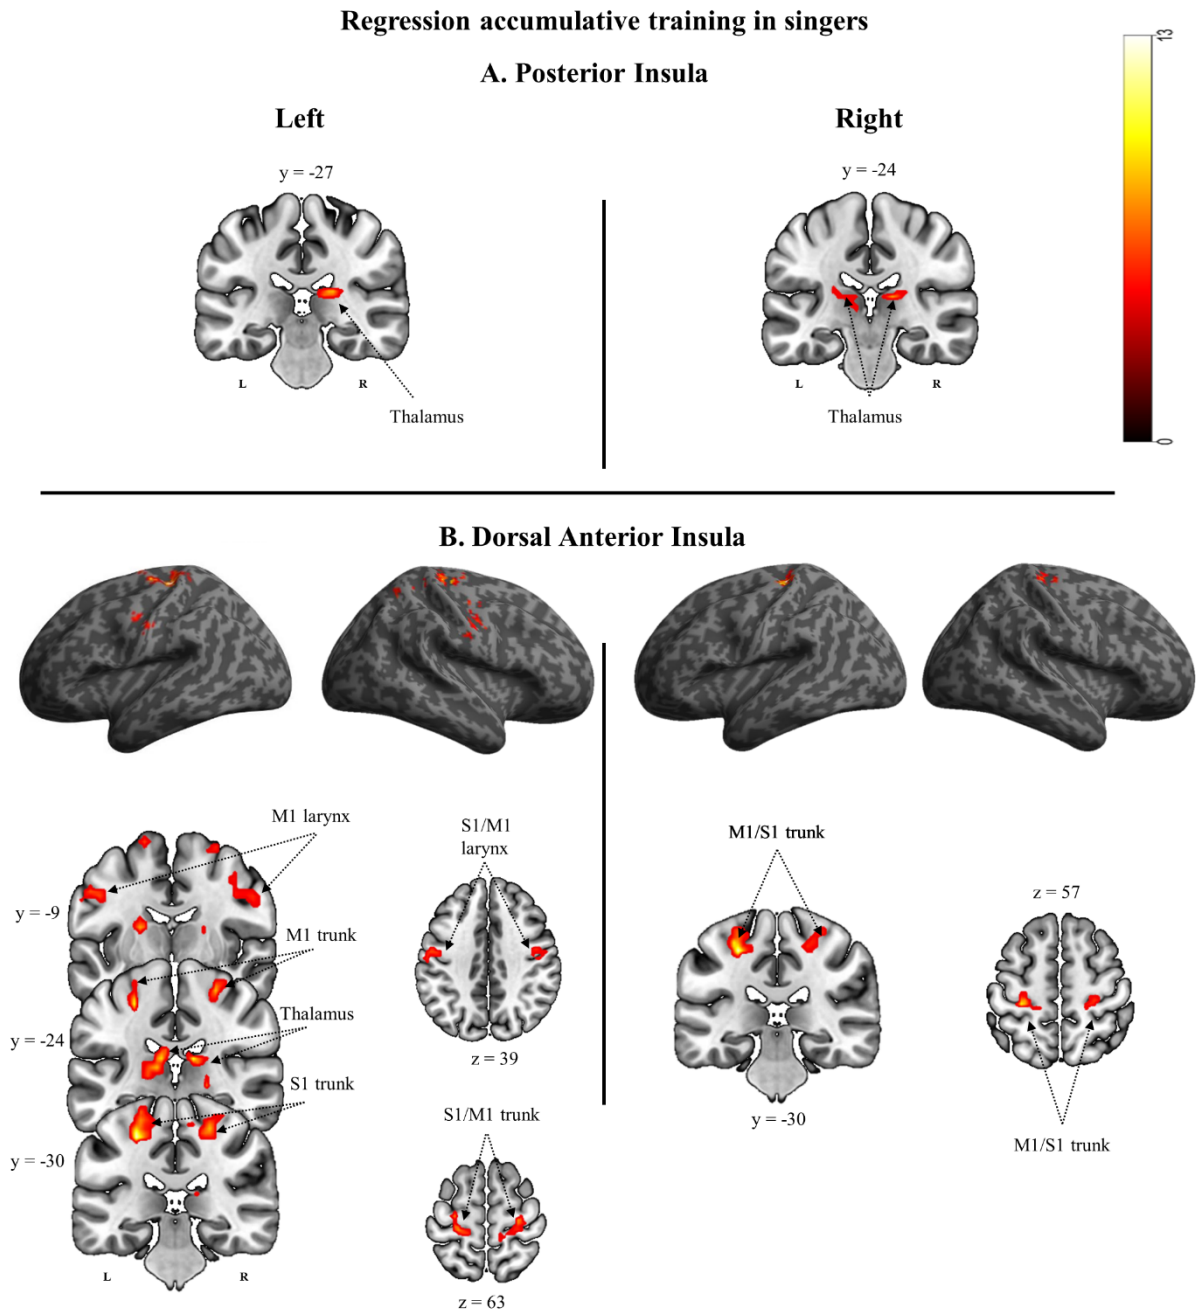

Figure 3: Results from regression analyses for each insular ROI to assess connectivity maps in relation to the amount of accumulated years of vocal training in singers. Only results surviving a cluster-extent based threshold of  $p < 0.05$  (FWER correction) are shown. Detailed information is provided in Table 2. Abbreviations: M1, primary motor cortex; S1, primary somatosensory cortex.



**Table 2. Correlations between insula connectivity maps with accumulated music training**

| Seed                          | <i>Left Insula ROIs</i> |                  |             |     |    |         |                | <i>Right Insula ROIs</i> |             |     |    |         |                |   |
|-------------------------------|-------------------------|------------------|-------------|-----|----|---------|----------------|--------------------------|-------------|-----|----|---------|----------------|---|
|                               | Co-activated region     | Cluster size     | Coordinates |     |    | t-value | R <sup>2</sup> | Cluster size             | Coordinates |     |    | t-value | R <sup>2</sup> |   |
|                               |                         |                  | MNI         | x   | y  |         |                |                          | z           | MNI | x  |         |                | y |
| <b>Posterior Insula</b>       |                         |                  |             |     |    |         |                |                          |             |     |    |         |                |   |
| Thalamus ( <i>Parietal</i> )  | R                       | 64               | 21          | -27 | 15 | 9.19    | 0.87           | 41                       | 15          | -24 | 12 | 9.12    | 0.90           |   |
| Thalamus ( <i>Temporal</i> )  | L                       | -                | -           | -   | -  | -       | -              | 43                       | -12         | -24 | 12 | 5.56    | 0.76           |   |
| <b>Dorsal Anterior Insula</b> |                         |                  |             |     |    |         |                |                          |             |     |    |         |                |   |
| M1 trunk ( <i>Area 4a</i> )   | L                       | 130 <sup>a</sup> | -24         | -30 | 63 | 7.93    | 0.87           | 75 <sup>a</sup>          | -30         | -30 | 57 | 10.06   | 0.91           |   |
| S1 trunk ( <i>Area 3a</i> )   | L                       | 130 <sup>a</sup> | -27         | -30 | 51 | 13.08   | 0.94           | 75 <sup>a</sup>          | -27         | -30 | 51 | 13.57   | 0.96           |   |
| M1 trunk ( <i>Area 4p</i> )   | R                       | 117 <sup>a</sup> | 24          | -24 | 60 | 8.89    | 0.89           | 47 <sup>a</sup>          | 30          | -24 | 63 | 6.96    | 0.83           |   |
| S1 trunk ( <i>Area 3a</i> )   | R                       | 117 <sup>a</sup> | 24          | -30 | 58 | 9.04    | 0.90           | 47 <sup>a</sup>          | 21          | -30 | 54 | 6.26    | 0.82           |   |
| M1 larynx ( <i>Area 4p</i> )  | L                       | 38               | -48         | -9  | 36 | 6.35    | 0.81           | -                        | -           | -   | -  | -       | -              |   |
| S1 larynx ( <i>Area 3b</i> )  | L                       | 38               | -54         | -9  | 39 | 6.57    | 0.82           | -                        | -           | -   | -  | -       | -              |   |
| M1 larynx ( <i>Area 4a</i> )  | R                       | 58 <sup>a</sup>  | 42          | -12 | 48 | 5.84    | 0.84           | -                        | -           | -   | -  | -       | -              |   |
| S1 larynx ( <i>Area 3b</i> )  | R                       | 58 <sup>a</sup>  | 53          | -12 | 33 | 6.40    | 0.85           | -                        | -           | -   | -  | -       | -              |   |
| Thalamus ( <i>Temporal</i> )  | L                       | 55               | -9          | -21 | 18 | 11.23   | 0.96           | -                        | -           | -   | -  | -       | -              |   |
| Putamen                       | L                       | 40               | -27         | 3   | 9  | 6.95    | 0.88           | -                        | -           | -   | -  | -       | -              |   |
| Thalamus ( <i>Temporal</i> )  | R                       | 71 <sup>a</sup>  | 12          | -21 | 15 | 11.24   | 0.94           | -                        | -           | -   | -  | -       | -              |   |
| Thalamus ( <i>Parietal</i> )  | R                       | 71 <sup>a</sup>  | 21          | -24 | -3 | 8.03    | 0.85           | -                        | -           | -   | -  | -       | -              |   |

MNI coordinates and local maxima of from regression analyses testing for correlations between each insular subdivision connectivity map with accumulated singing training. Only results that survived a cluster-extent based threshold of  $p < 0.05$  (FWER correction) are shown. T-values of significantly activated peak-voxels refer to MNI coordinates (<sup>a</sup> = same cluster). Brodmann Areas (BA) labeling was performed using the Automatic Anatomic Labeling toolbox (AAL; 2002). Probabilistic cytoarchitectonic maps for structure–function relationships in standard reference space (brackets) were assigned using the Anatomy Toolbox (Eickhoff et al., 2005). Abbreviations:  $d_{\text{unb}}$ , effect size as unbiased Cohen's  $d$  (Cohen, 2013); M1, primary motor cortex; S1, primary somatosensory cortex.



## DISCUSSION

In this fMRI resting-state study, we compared temporally correlated spontaneous blood oxygen level–dependent (BOLD) fluctuations between conservatory trained singers and non-singers. Direct comparisons revealed bilaterally increased connectivity in posterior and anterior insula subdivisions in singers with constituents of the sensorimotor speech network. Moreover, accumulated singing training correlated positively with increased insula connectivity, particularly between the dorsal anterior insula with primary motor and somatosensory cortices in the somatotopic representations of the larynx and the diaphragm, as well as with the thalamus and the putamen. These results indicate neuroplastic changes within insula-based networks as a function of singing expertise.

### **Insula connectivity patterns across groups**

Previous studies identified a vast number of functional and structural connections between the insula and both cortical and subcortical brain regions subserving sensory, emotional, motivational and cognitive processes (Gogolla, 2017; Nomi et al., 2018). Specifically, functional segregation based on resting-state co-activation patterns have suggested a tripartite organization of insula subdivisions that contain both unique and overlapping functional profiles (Deen et al., 2011; Uddin et al., 2014). These profiles encompass the posterior insula (PI), the dorsal anterior insula (dAI), and the ventral anterior insula (vAI) and have been supported by the insula's structural organization (Nomi et al., 2018). In the current study, we replicated previous results (Deen et al., 2011; Uddin et al., 2014; Zamorano et al., 2017; Zamorano et al., 2019), demonstrating a predominantly “cognitive” frontoparietal connectivity pattern of the dAI, a stronger co-activation pattern of the vAI with regions involved in affective processing, and a sensorimotor co-activation pattern for the PI. We furthermore confirmed an overlap between co-activated areas across insula subdivisions (Nomi et al., 2018). Direct group comparisons showed significantly enhanced connectivity across all insula subdivisions in trained singers relative to non-singers, but not for the reversed comparison.

### **Enhanced PI connectivity in singers versus non-singers**

We found increased connectivity in conservatory trained singers between bilateral PI and lobule VI of the cerebellum, a somatotopically organized sensorimotor region that receives somatosensory afferents from the vocal tract and sends out efferents to motor areas (Grodd et al., 2005; Grodd et al., 2001; O'Reilly et al., 2010; Stoodley and Schmahmann, 2010), including those engaged in speaking and singing (Brown et al., 2004; Brown et al., 2006). This is consistent with the unique profile of the PI, which is predominantly associated with sensorimotor processes and the interoceptive representation of visceral and sensory feelings from the body (Berret et al., 2019; Chang et al., 2013; Craig, 2002; Olausson et al., 2002; Pugnaghi et al., 2011; Segerdahl et al., 2015), including orofacial regions (Ikenoue et al., 2018; Sato et al., 2017; Tsutsumi et al., 2018; Yoshida et al., 2017).

Lesions of the PI (Baier et al., 2011) as well as the cerebellar lobule VI give rise to speech motor disorders (Ackermann et al., 2007; Ackermann et al., 1992). Lobule VI shows moreover overlapping functional activation for both the production and perception of song and speech (Ackermann, 2008; Callan et al., 2007; Mathiak et al., 2002). A role in perceptual processes links the cerebellum to predictive mechanisms in both motor and non-motor (cognitive) aspects of language (Argyropoulos, 2016; Bastian, 2006; Friston and Herreros, 2016; Guenther, 2006; Guenther et al., 2006; Knolle et al., 2012; Shadmehr et al., 2010). Based these functions, we suggest that the observed increased PI-cerebellar connectivity in trained singers may be related to perceptual optimization and prediction processes (Baumann et al., 2015; Moberget and Ivry, 2016), which has been associated with enhanced behavioral performance in musicians (Baer et al., 2015; Kleber et al., 2017; Lu et al., 2014) and smooth sensorimotor tuning (Ackermann, 2008; Fujioka et al., 2015).

### **Enhanced dAI connectivity in singers versus non-singers**

In the current study, we found increased functional connectivity in singers between the left dAI with the bilateral inferior parietal lobe (IPL), adjacent S1 (area 2), and the cerebellum

(lobule VI). The right dAI showed increased functional connectivity with right S1 (area 2) and the cerebellum (lobule VI and crus 2). Crus 2 has been linked to executive control, whereas lobule VI has also been associated with salience processing (Baumann et al., 2015; Habas et al., 2009), a task that requires top-down attention and cognitive control in the context of planned actions (Uddin, 2015). Enhanced connectivity within the salience network during resting state has moreover been found in professional musicians (Luo et al., 2014; Zamorano et al., 2017; Zamorano et al., 2019).

Although strongly interconnected with the PI (Kurth et al., 2010), the unique functional profile of the dAI is associated with salience detection and high-level cognitive processes, such as task-related attention switching, inhibition, and error awareness (Klein et al., 2013; Menon and Uddin, 2010; Uddin, 2015), in line with results in the current study. The typical co-activation pattern of the dAI encompasses functionally diverse brain regions, including those that pertain to phonological and speech processes (Uddin et al., 2014), which links the anterior insula to higher-order aspects of speech motor control (Ackermann and Riecker, 2004, 2010). Specifically, it has been suggested that the dAI may act as a relay between more cognitive aspects of verbal communication and motor coordination, thus contributing to serial processing within a core speech network that involves BA44, the basal ganglia, and the cerebellum (Adank, 2012; Eickhoff et al., 2009; Oh et al., 2014). This is consistent with a role of the insula in sound-to-speech transformations within the dorsal stream speech network (Cloutman et al., 2012; Hickok, 2017).

The co-activation patterns of lobule VI suggest that it also contributes to cognitive aspects of language processes together with frontoparietal regions (Stoodley et al., 2012; Vias and Dick, 2017). The inferior parietal lobe (IPL) and S1 (area 2) are tightly interconnected (Borich et al., 2015) and serve as an interface to process proprioceptive signals and body-related information (Prevosto et al., 2011; Tsakiris et al., 2007). They also support the preparation and coordination of speech-related vocal tract movements (Bouchard et al., 2013; Golfinopoulos et al., 2011;

Nasir and Ostry, 2006; Tremblay et al., 2003), contributing nearly 7 times more to the vocal motor system in humans than in non-human primates (Kumar et al., 2016). Previous studies found that trained singers show increased activation in ventral S1, IPL, and the cerebellum during normal singing (Kleber et al., 2010) as well as increased gray-matter volume in S1/IPL relative to non-singers (Kleber et al., 2016). Functionally, the IPL and the cerebellum interact with the dAI to dynamically adapt for sensory feedback perturbations during singing, allowing greater pitch-matching accuracy through enhanced sensorimotor feedback and feedforward control mechanisms in singers (Jones and Keough, 2008; Kleber et al., 2017; Kleber et al., 2013; Zarate and Zatorre, 2008). Such functions have been supported by studies investigating the neural correlates of sensorimotor control of speech and song production (Behroozmand and Sangtian, 2018; Correia et al., 2015; Finkel et al., 2019; Guenther and Vladusich, 2012; Hickok, 2017; Houde and Chang, 2015; Parkinson et al., 2012; Shum et al., 2011).

Taken together, enhanced connectivity with the dAI in singers may indicate enhanced sequencing and sensorimotor mechanisms (Ackermann, 2008; Bohland and Guenther, 2006; Ziegler and Ackermann, 2017) as well as enhanced cognitive control pertaining to the execution of planned actions (Eickhoff et al., 2009; Ito, 2008; Pisotta and Molinari, 2014; Stoodley et al., 2012), which may facilitate the organization of motor patterns in the context of musically defined performance goals (Zatorre and Baum, 2012).

### **Enhanced vAI connectivity in singers versus non-singers**

The vAI is more strongly associated with valence attribution, body awareness, and affective processing (Craig, 2009, 2010). In the current study, trained singers showed increased co-activation with the left vAI involved the superior parietal lobe, intraparietal sulcus, and the right prefrontal lobe (BA10/Frontal Pole). The latter is involved in mediating limbic reward and learning processes (Denny et al., 2014; Kufahl et al., 2005). However, connection patterns of right frontal pole (FP1) suggest that it also plays a critical role in supporting high-level cognitive processes, such as language and working memory (Gilbert et al., 2006; Liu et al.,

2013; Ray et al., 2015). This is in line with a functional specialization of BA10, in which lateral regions may act as a gateway to shift attention from external (sensory) monitoring to internal activation of behavioral responses (Howe et al., 2013). Such cued response representations are a typical feature of musical performances, for example when the conductor signals the singer the precisely timed (vocal) entrance after a period of rest.

Although the observed increased connectivity with the SPL in the current study does not comfortably fit within its unique profile, studies have associated the vAI also with task-level control and focal attention (Nelson et al., 2010), perhaps based on its structural connection to the parietal lobe via the inferior frontooccipital fasciculus (Nomi et al., 2018). The parietal lobe is moreover part of a frontoparietal attentional control system (Uddin, 2015), which contributes to task performance when stimulus-response associations have been well trained and can be prepared in advance (Corbetta and Shulman, 2002). SPL activation in musicians has also been associated with heightened sensorimotor control, increased attention, and working memory load (Foster and Zatorre, 2010; Pallesen et al., 2010; Stewart et al., 2003; Strait et al., 2010), suggesting that increased vAI connectivity with frontoparietal areas in trained singers in the current study could reflect attentional processes related to task-specific multisensory awareness (Janata et al., 2002; Nelson et al., 2010; Simmons et al., 2013).

### **Insula connectivity as a function of accumulated singing training**

The insula contributes to the spinothalamocortical pathway, in which the lamina I projects afferent information from body tissues via the thalamus to both the somatosensory area 3a and the posterior insula, the so-called interoceptive cortex (Craig, 2002, 2009, 2010). These signals are re-represented, integrated, and affectively evaluated in the insula along a posterior-to-anterior progression scheme, generating a comprehensive representation of one's feelings. In the current study, we found enhanced connectivity as a function of singing experience among constituents of this pathway. Specifically, between (i) the bilateral PI with the thalamus, (ii) the dAI (bilaterally) with the sensorimotor representation (S1/M1) of the diaphragm, and (iii) the

left dAI furthermore with the bilateral sensorimotor representation (S1/M1) representation of the larynx, bilateral thalamus, and the left putamen. We propose that the observed enhanced functional connectivity among these regions in the current study reflects a role of the insula as a major integration site for task-relevant bodily information based on experience (Critchley et al., 2004; Kleber et al., 2017; Schirmer-Mokwa et al., 2015; Zamorano et al., 2017; Zamorano et al., 2019).

This interpretation is supported by the specific functional involvement of the co-activated areas, which process visceral and somatosensory information underlying voluntary respiratory, laryngeal, and articulatory sensorimotor control (Banzett et al., 2000; Bouchard et al., 2013; Brown et al., 2008; Conant et al., 2014; Conant et al., 2018; Khalsa et al., 2009; Pfenning et al., 2014). Vocalization related movements are accompanied by proprioceptive, kinesthetic, and interoceptive consequences, which in turn are integrated with the motor system to guide song and speech production (Bernardi et al., 2015; Gozaine and Clark, 2005; Nasir and Ostry, 2006; Simonyan and Horwitz, 2011; Smotherman, 2007; Tremblay et al., 2003; Wyke, 1974). For example, every movement specifically stimulates a corresponding somatosensory region in S1 (Giraud and Poeppel, 2012; Schomers and Pulvermuller, 2016), which is intrinsically connected to ipsilateral M1 and IPL (Borich et al., 2015; Bouchard et al., 2013), involves the thalamus (Ackermann and Riecker, 2010; Hwang et al., 2017), and becomes tightly associated with corresponding auditory-motor transformations (Ito et al., 2016; Ito and Ostry, 2010, 2012; Ito et al., 2015; Ito et al., 2009). Moreover, M1 sends its strongest subcortical projections to the putamen (Simonyan and Horwitz, 2011), which shows increased activations in more proficient singers (Kleber et al., 2010; Segado et al., 2018; Zarate and Zatorre, 2008).

Importantly, the insula is substantially involved in the integration of sensory and visceral inputs with motor modalities to coordinate respiratory and vocal tract musculature (Ackermann and Riecker, 2010; Dronkers, 1996; Oh et al., 2014; Simonyan et al., 2007), based on its connectivity with cortical areas associated with different aspects of sensorimotor and cognitive

control of speech (Battistella et al., 2018). At the cortical level, the voluntary control of expiratory, laryngeal, and articulatory activity is somatotopically overlapping in ventral sensorimotor cortex (Belyk and Brown, 2017; Kumar et al., 2016; Loucks et al., 2007). Conversely, the voluntary regulation of inspiratory patterns, such as taking a deeper than normal breath before a long musical phrase (Ackermann and Riecker, 2010; Leanderson et al., 1987; Smotherman et al., 2010; Watson and Hixon, 1985), is more dorsally located within the somatotopic representation of the trunk and diaphragm (Eickhoff et al., 2008). Both regions are activated during pitch-matching tasks in trained singers (Kleber et al., 2017; Kleber et al., 2013). Increased connectivity strength with these areas as a function of singing experience in the current study may therefore indicate that the insula contributes increasingly to body awareness in singers, thus supporting optimal vocal performance via enhanced integration of task-related bodily sensations (Kleber et al., 2017; Kleber et al., 2013; Schirmer-Mokwa et al., 2015; Zarate, 2013).

### **Limitations**

Limitations of this study include the fact that resting state fMRI exposes participants to continuous scanner noise, which may reduce the robustness and the replicability of functional connectivity findings within the somatosensory, auditory, and motor networks (Andoh et al., 2017). However, robust experience-dependent differences in S1/M1 in vocalization areas in the current study replicate previous findings with classical instrumental musicians, in which greater experience yielded greater insular connectivity with the sensorimotor hand area (Zamorano et al., 2017). Together, this supports a critical role of insula-based networks in body awareness underlying music production. However, taking into account that participants in the current study were conservatory trained singers, we cannot rule out the possibility that co-activation patterns differ in amateur-level singers. Finally, future studies should replicate these results in bigger samples to improve the generalizability of these results.

## Conclusions

This study has examined the impact of singing training on insula-based network connectivity. The results of this research support the idea that the insula plays a central role in modulating sensory integration within the vocal system (Cloutman et al., 2012; Nieuwenhuys, 2012; Parkinson et al., 2012), perhaps by regulating conscious and non-conscious aspects of salience processing associated with singing-related bodily processes (Allen et al., 2016; Chong et al., 2017). This may optimize the processing, manipulation, and transformation of sensory information based on experience (Zarate, 2013; Zarate and Zatorre, 2005). Together, our data add to the growing body of literature, suggesting that trained singers may increasingly rely on somatosensory feedback processing to support vocal motor control (Jones and Keough, 2008; Kleber et al., 2017; Kleber et al., 2010; Kleber et al., 2013; Mürbe et al., 2004; Zarate and Zatorre, 2008). It also accords with earlier observations, demonstrating heightened sensitivity to interoceptive and exteroceptive stimuli in musicians and dancers compared to laymen (Christensen et al., 2017; Schirmer-Mokwa et al., 2015; Zamorano et al., 2014). As changes in temporally correlated spontaneous fluctuations of blood oxygen level-dependent (BOLD) signals can be associated with both the type of training and the corresponding behavioral performance (Baldassarre et al., 2012; Fauvel et al., 2014; Luo et al., 2012; Palomar-Garcia et al., 2017; Vahdat et al., 2011; Ventura-Campos et al., 2013; Zamorano et al., 2017), our findings provide converging evidence for a central role of the insula in speech and music processing.



## References

- Ackermann, H., 2008. Cerebellar contributions to speech production and speech perception: psycholinguistic and neurobiological perspectives. *Trends Neurosci* 31, 265-272.
- Ackermann, H., Mathiak, K., Riecker, A., 2007. The contribution of the cerebellum to speech production and speech perception: clinical and functional imaging data. *Cerebellum* (London, England) 6, 202-213.
- Ackermann, H., Riecker, A., 2004. The contribution of the insula to motor aspects of speech production: a review and a hypothesis. *Brain Lang* 89, 320-328.
- Ackermann, H., Riecker, A., 2010. The contribution(s) of the insula to speech production: a review of the clinical and functional imaging literature. *Brain Struct Funct* 214, 419-433.
- Ackermann, H., Vogel, M., Petersen, D., Poremba, M., 1992. Speech deficits in ischaemic cerebellar lesions. *Journal of neurology* 239, 223-227.
- Adank, P., 2012. The neural bases of difficult speech comprehension and speech production: Two Activation Likelihood Estimation (ALE) meta-analyses. *Brain Lang* 122, 42-54.
- Allen, M., Fardo, F., Dietz, M.J., Hillebrandt, H., Friston, K.J., Rees, G., Roepstorff, A., 2016. Anterior insula coordinates hierarchical processing of tactile mismatch responses. *NeuroImage* 127, 34-43.
- Andoh, J., Ferreira, M., Leppert, I.R., Matsushita, R., Pike, B., Zatorre, R.J., 2017. How restful is it with all that noise? Comparison of Interleaved silent steady state (ISSS) and conventional imaging in resting-state fMRI. *NeuroImage* 147, 726-735.
- Ardila, A., Bernal, B., Rosselli, M., 2014. Participation of the insula in language revisited: A meta-analytic connectivity study. *J Neurolinguist* 29, 31-41.
- Argyropoulos, G.P., 2016. The cerebellum, internal models and prediction in 'non-motor' aspects of language: A critical review. *Brain Lang* 161, 4-17.
- Ashburner, J., Friston, K.J., 2005. Unified segmentation. *NeuroImage* 26, 839-851.
- Augustine, J.R., 1996. Circuitry and functional aspects of the insular lobe in primates including humans. *Brain research. Brain research reviews* 22, 229-244.
- Baer, L.H., Park, M.T., Bailey, J.A., Chakravarty, M.M., Li, K.Z., Penhune, V.B., 2015. Regional cerebellar volumes are related to early musical training and finger tapping performance. *NeuroImage* 109, 130-139.
- Baier, B., zu Eulenburg, P., Glassl, O., Dieterich, M., 2011. Lesions to the posterior insular cortex cause dysarthria. *European journal of neurology : the official journal of the European Federation of Neurological Societies* 18, 1429-1431.
- Baldassarre, A., Lewis, C.M., Committeri, G., Snyder, A.Z., Romani, G.L., Corbetta, M., 2012. Individual variability in functional connectivity predicts performance of a perceptual task. *Proc Natl Acad Sci U S A* 109, 3516-3521.
- Banzett, R.B., Mulnier, H.E., Murphy, K., Rosen, S.D., Wise, R.J., Adams, L., 2000. Breathlessness in humans activates insular cortex. *NeuroReport* 11, 2117-2120.
- Bastian, A.J., 2006. Learning to predict the future: the cerebellum adapts feedforward movement control. *Curr Opin Neurobiol* 16, 645-649.
- Battistella, G., Kumar, V., Simonyan, K., 2018. Connectivity profiles of the insular network for speech control in healthy individuals and patients with spasmodic dysphonia. *Brain Struct Funct* 223, 2489-2498.
- Baumann, O., Borra, R.J., Bower, J.M., Cullen, K.E., Habas, C., Ivry, R.B., Leggio, M., Mattingley, J.B., Molinari, M., Moulton, E.A., Paulin, M.G., Pavlova, M.A., Schmahmann, J.D., Sokolov, A.A., 2015. Consensus paper: the role of the cerebellum in perceptual processes. *Cerebellum* (London, England) 14, 197-220.
- Behrens, T.E., Johansen-Berg, H., Woolrich, M.W., Smith, S.M., Wheeler-Kingshott, C.A., Boulby, P.A., Barker, G.J., Sillery, E.L., Sheehan, K., Ciccarelli, O., Thompson, A.J., Brady, J.M.,

- Matthews, P.M., 2003. Non-invasive mapping of connections between human thalamus and cortex using diffusion imaging. *Nat Neurosci* 6, 750-757.
- Behroozmand, R., Sangtian, S., 2018. Neural bases of sensorimotor adaptation in the vocal motor system. *Exp Brain Res* 236, 1881-1895.
- Belyk, M., Brown, S., 2017. The origins of the vocal brain in humans. *Neurosci Biobehav Rev* 77, 177-193.
- Bernardi, N.F., Darainy, M., Ostry, D.J., 2015. Somatosensory Contribution to the Initial Stages of Human Motor Learning. *J Neurosci* 35, 14316-14326.
- Berret, E., Kintscher, M., Palchadhuri, S., Tang, W., Osypenko, D., Kochubey, O., Schneggenburger, R., 2019. Insular cortex processes aversive somatosensory information and is crucial for threat learning. *Science* 364.
- Biswal, B., Yetkin, F.Z., Haughton, V.M., Hyde, J.S., 1995. Functional connectivity in the motor cortex of resting human brain using echo-planar MRI. *Magn Reson Med* 34, 537-541.
- Bohland, J.W., Guenther, F.H., 2006. An fMRI investigation of syllable sequence production. *NeuroImage* 32, 821-841.
- Borich, M.R., Brodie, S.M., Gray, W.A., Ionta, S., Boyd, L.A., 2015. Understanding the role of the primary somatosensory cortex: Opportunities for rehabilitation. *Neuropsychologia* 79, 246-255.
- Bouchard, K.E., Mesgarani, N., Johnson, K., Chang, E.F., 2013. Functional organization of human sensorimotor cortex for speech articulation. *Nature* 495, 327-332.
- Brown, S., Martinez, M.J., Hodges, D.A., Fox, P.T., Parsons, L.M., 2004. The song system of the human brain. *Brain Res Cogn Brain Res* 20, 363-375.
- Brown, S., Martinez, M.J., Parsons, L.M., 2006. Music and language side by side in the brain: a PET study of the generation of melodies and sentences. *Eur J Neurosci* 23, 2791-2803.
- Brown, S., Ngan, E., Liotti, M., 2008. A larynx area in the human motor cortex. *Cereb Cortex* 18, 837-845.
- Callan, D.E., Kawato, M., Parsons, L., Turner, R., 2007. Speech and song: the role of the cerebellum. *Cerebellum (London, England)* 6, 321-327.
- Cauda, F., D'Agata, F., Sacco, K., Duca, S., Geminiani, G., Vercelli, A., 2011. Functional connectivity of the insula in the resting brain. *NeuroImage* 55, 8-23.
- Chang, L.J., Yarkoni, T., Khaw, M.W., Sanfey, A.G., 2013. Decoding the role of the insula in human cognition: functional parcellation and large-scale reverse inference. *Cereb Cortex* 23, 739-749.
- Chao-Gan, Y., Yu-Feng, Z., 2010. DPARSF: A MATLAB Toolbox for "Pipeline" Data Analysis of Resting-State fMRI. *Frontiers in systems neuroscience* 4, 13.
- Chong, J.S.X., Ng, G.J.P., Lee, S.C., Zhou, J., 2017. Salience network connectivity in the insula is associated with individual differences in interoceptive accuracy. *Brain Struct Funct* 222, 1635-1644.
- Christensen, J.F., Gaigg, S.B., Calvo-Merino, B., 2017. I can feel my heartbeat: Dancers have increased interoceptive accuracy. *Psychophysiology*.
- Cloutman, L.L., Binney, R.J., Drakesmith, M., Parker, G.J., Lambon Ralph, M.A., 2012. The variation of function across the human insula mirrors its patterns of structural connectivity: evidence from in vivo probabilistic tractography. *NeuroImage* 59, 3514-3521.
- Cohen, J., 2013. *Statistical power analysis for the behavioral sciences*. Academic press.
- Conant, D., Bouchard, K.E., Chang, E.F., 2014. Speech map in the human ventral sensory-motor cortex. *Curr Opin Neurobiol* 24, 63-67.
- Conant, D.F., Bouchard, K.E., Leonard, M.K., Chang, E.F., 2018. Human Sensorimotor Cortex Control of Directly Measured Vocal Tract Movements during Vowel Production. *J Neurosci* 38, 2955-2966.
- Corbetta, M., Shulman, G.L., 2002. Control of goal-directed and stimulus-driven attention in the brain. *Nat Rev Neurosci* 3, 201-215.
- Correia, J.M., Jansma, B.M., Bonte, M., 2015. Decoding Articulatory Features from fMRI Responses in Dorsal Speech Regions. *J Neurosci* 35, 15015-15025.

- Cox, R.W., 1996. AFNI: software for analysis and visualization of functional magnetic resonance neuroimages. *Computers and biomedical research, an international journal* 29, 162-173.
- Craig, A.D., 2002. How do you feel? Interoception: the sense of the physiological condition of the body. *Nat Rev Neurosci* 3, 655-666.
- Craig, A.D., 2009. How do you feel--now? The anterior insula and human awareness. *Nat Rev Neurosci* 10, 59-70.
- Craig, A.D., 2010. The sentient self. *Brain Struct Funct* 214, 563-577.
- Critchley, H.D., Wiens, S., Rotshtein, P., Ohman, A., Dolan, R.J., 2004. Neural systems supporting interoceptive awareness. *Nat Neurosci* 7, 189-195.
- Dalla Bella, S., Giguere, J.F., Peretz, I., 2007. Singing proficiency in the general population. *J Acoust Soc Am* 121, 1182-1189.
- Deen, B., Pitskel, N.B., Pelphrey, K.A., 2011. Three systems of insular functional connectivity identified with cluster analysis. *Cereb Cortex* 21, 1498-1506.
- Denny, B.T., Ochsner, K.N., Weber, J., Wager, T.D., 2014. Anticipatory brain activity predicts the success or failure of subsequent emotion regulation. *Social cognitive and affective neuroscience* 9, 403-411.
- Dick, A.S., Bernal, B., Tremblay, P., 2014. The language connectome: new pathways, new concepts. *Neuroscientist* 20, 453-467.
- Dronkers, N.F., 1996. A new brain region for coordinating speech articulation. *Nature* 384, 159-161.
- Eickhoff, S.B., Grefkes, C., Fink, G.R., Zilles, K., 2008. Functional lateralization of face, hand, and trunk representation in anatomically defined human somatosensory areas. *Cereb Cortex* 18, 2820-2830.
- Eickhoff, S.B., Heim, S., Zilles, K., Amunts, K., 2009. A systems perspective on the effective connectivity of overt speech production. *Philosophical transactions. Series A, Mathematical, physical, and engineering sciences* 367, 2399-2421.
- Eickhoff, S.B., Stephan, K.E., Mohlberg, H., Grefkes, C., Fink, G.R., Amunts, K., Zilles, K., 2005. A new SPM toolbox for combining probabilistic cytoarchitectonic maps and functional imaging data. *NeuroImage* 25, 1325-1335.
- Elmer, S., Hanggi, J., Jancke, L., 2016. Interhemispheric transcalsal connectivity between the left and right planum temporale predicts musicianship, performance in temporal speech processing, and functional specialization. *Brain Struct Funct* 221, 331-344.
- Fauvel, B., Groussard, M., Chetelat, G., Fouquet, M., Landeau, B., Eustache, F., Desgranges, B., Platel, H., 2014. Morphological brain plasticity induced by musical expertise is accompanied by modulation of functional connectivity at rest. *NeuroImage* 90, 179-188.
- Finkel, S., Veit, R., Lotze, M., Friberg, A., Vuust, P., Soekadar, S., Birbaumer, N., Kleber, B., 2019. Intermittent theta burst stimulation over right somatosensory larynx cortex enhances vocal pitch-regulation in nonsingers. *Hum Brain Mapp*.
- Foster, N.E., Zatorre, R.J., 2010. A role for the intraparietal sulcus in transforming musical pitch information. *Cereb Cortex* 20, 1350-1359.
- Fox, M.D., Greicius, M., 2010. Clinical applications of resting state functional connectivity. *Frontiers in systems neuroscience* 4, 19.
- Fox, M.D., Raichle, M.E., 2007. Spontaneous fluctuations in brain activity observed with functional magnetic resonance imaging. *Nat Rev Neurosci* 8, 700-711.
- Friston, K., Herreros, I., 2016. Active Inference and Learning in the Cerebellum. *Neural Comput* 28, 1812-1839.
- Friston, K.J., Jezzard, P., Turner, R., 1994. Analysis of functional MRI time-series. *Human Brain Mapping* 1, 153-171.
- Friston, K.J., Josephs, O., Zarahn, E., Holmes, A.P., Rouquette, S., Poline, J., 2000. To smooth or not to smooth? Bias and efficiency in fMRI time-series analysis. *NeuroImage* 12, 196-208.
- Fujioka, T., Ross, B., Trainor, L.J., 2015. Beta-Band Oscillations Represent Auditory Beat and Its Metrical Hierarchy in Perception and Imagery. *J Neurosci* 35, 15187-15198.

- Gilbert, S.J., Spengler, S., Simons, J.S., Steele, J.D., Lawrie, S.M., Frith, C.D., Burgess, P.W., 2006. Functional specialization within rostral prefrontal cortex (area 10): a meta-analysis. *J Cogn Neurosci* 18, 932-948.
- Giraud, A.L., Poeppel, D., 2012. Cortical oscillations and speech processing: emerging computational principles and operations. *Nat Neurosci* 15, 511-517.
- Gogolla, N., 2017. The insular cortex. *Curr Biol* 27, R580-R586.
- Golfinopoulos, E., Tourville, J.A., Bohland, J.W., Ghosh, S.S., Nieto-Castanon, A., Guenther, F.H., 2011. fMRI investigation of unexpected somatosensory feedback perturbation during speech. *NeuroImage* 55, 1324-1338.
- Gozaine, T.C., Clark, K.F., 2005. Function of the laryngeal mechanoreceptors during vocalization. *Laryngoscope* 115, 81-88.
- Grodd, W., Hulsmann, E., Ackermann, H., 2005. Functional MRI localizing in the cerebellum. *Neurosurgery clinics of North America* 16, 77-99, v.
- Grodd, W., Hulsmann, E., Lotze, M., Wildgruber, D., Erb, M., 2001. Sensorimotor mapping of the human cerebellum: fMRI evidence of somatotopic organization. *Hum Brain Mapp* 13, 55-73.
- Gu, X., FitzGerald, T.H., 2014. Interoceptive inference: homeostasis and decision-making. *Trends Cogn Sci* 18, 269-270.
- Guenther, F.H., 2006. Cortical interactions underlying the production of speech sounds. *Journal of communication disorders* 39, 350-365.
- Guenther, F.H., 2016. Neural control of speech. The MIT Press, Cambridge, MA.
- Guenther, F.H., Ghosh, S.S., Tourville, J.A., 2006. Neural modeling and imaging of the cortical interactions underlying syllable production. *Brain Lang* 96, 280-301.
- Guenther, F.H., Hickok, G., 2015. Role of the auditory system in speech production. *Handb Clin Neurol* 129, 161-175.
- Guenther, F.H., Vladusich, T., 2012. A Neural Theory of Speech Acquisition and Production. *Journal of neurolinguistics* 25, 408-422.
- Guerra-Carrillo, B., Mackey, A.P., Bunge, S.A., 2014. Resting-state fMRI: a window into human brain plasticity. *Neuroscientist* 20, 522-533.
- Habas, C., Kamdar, N., Nguyen, D., Prater, K., Beckmann, C.F., Menon, V., Greicius, M.D., 2009. Distinct cerebellar contributions to intrinsic connectivity networks. *J Neurosci* 29, 8586-8594.
- Hage, S.R., Nieder, A., 2016. Dual Neural Network Model for the Evolution of Speech and Language. *Trends Neurosci* 39, 813-829.
- Heller, R., Stanley, D., Yekutieli, D., Rubin, N., Benjamini, Y., 2006. Cluster-based analysis of fMRI data. *NeuroImage* 33, 599-608.
- Herholz, S.C., Zatorre, R.J., 2012. Musical training as a framework for brain plasticity: behavior, function, and structure. *Neuron* 76, 486-502.
- Hertrich, I., Dietrich, S., Ackermann, H., 2016. The role of the supplementary motor area for speech and language processing. *Neurosci Biobehav Rev* 68, 602-610.
- Hickok, G., 2017. A cortical circuit for voluntary laryngeal control: Implications for the evolution of language. *Psychon Bull Rev* 24, 56-63.
- Houde, J.F., Chang, E.F., 2015. The cortical computations underlying feedback control in vocal production. *Curr Opin Neurobiol* 33, 174-181.
- Howe, W.M., Berry, A.S., Francois, J., Gilmour, G., Carp, J.M., Tricklebank, M., Lustig, C., Sarter, M., 2013. Prefrontal cholinergic mechanisms instigating shifts from monitoring for cues to cue-guided performance: converging electrochemical and fMRI evidence from rats and humans. *J Neurosci* 33, 8742-8752.
- Hwang, K., Bertolero, M.A., Liu, W.B., D'Esposito, M., 2017. The Human Thalamus Is an Integrative Hub for Functional Brain Networks. *J Neurosci* 37, 5594-5607.
- Ikenoue, E., Akhter, F., Tsutsumi, Y., Sato, F., Ohara, H., Uchino, K., Furuta, T., Tachibana, Y., Yoshida, A., 2018. Transcortical descending pathways through granular insular cortex conveying orofacial proprioception. *Brain Res* 1687, 11-19.

- Ito, M., 2008. Control of mental activities by internal models in the cerebellum. *Nat Rev Neurosci* 9, 304-313.
- Ito, T., Coppola, J.H., Ostry, D.J., 2016. Speech motor learning changes the neural response to both auditory and somatosensory signals. *Sci Rep* 6, 25926.
- Ito, T., Ostry, D.J., 2010. Somatosensory contribution to motor learning due to facial skin deformation. *J Neurophysiol* 104, 1230-1238.
- Ito, T., Ostry, D.J., 2012. Speech sounds alter facial skin sensation. *J Neurophysiol* 107, 442-447.
- Ito, T., Ostry, D.J., Gracco, V.L., 2015. Somatosensory Event-related Potentials from Orofacial Skin Stretch Stimulation. *Journal of visualized experiments : JoVE*, e53621.
- Ito, T., Tiede, M., Ostry, D.J., 2009. Somatosensory function in speech perception. *Proc Natl Acad Sci U S A* 106, 1245-1248.
- Janata, P., Tillmann, B., Bharucha, J.J., 2002. Listening to polyphonic music recruits domain-general attention and working memory circuits. *Cognitive, affective & behavioral neuroscience* 2, 121-140.
- Jeffries, K.J., Fritz, J.B., Braun, A.R., 2003. Words in melody: an H(2)15O PET study of brain activation during singing and speaking. *NeuroReport* 14, 749-754.
- Jones, J.A., Keough, D., 2008. Auditory-motor mapping for pitch control in singers and nonsingers. *Exp Brain Res* 190, 279-287.
- Jurgens, U., 2002. Neural pathways underlying vocal control. *Neurosci Biobehav Rev* 26, 235-258.
- Jurgens, U., 2009. The neural control of vocalization in mammals: a review. *J Voice* 23, 1-10.
- Karnath, H.O., Baier, B., 2010. Right insula for our sense of limb ownership and self-awareness of actions. *Brain Struct Funct* 214, 411-417.
- Khalsa, S.S., Rudrauf, D., Feinstein, J.S., Tranel, D., 2009. The pathways of interoceptive awareness. *Nat Neurosci* 12, 1494-1496.
- Kleber, B., Friberg, A., Zeitouni, A., Zatorre, R., 2017. Experience-dependent modulation of right anterior insula and sensorimotor regions as a function of noise-masked auditory feedback in singers and nonsingers. *NeuroImage* 147, 97-110.
- Kleber, B., Veit, R., Birbaumer, N., Gruzelier, J., Lotze, M., 2010. The brain of opera singers: experience-dependent changes in functional activation. *Cereb Cortex* 20, 1144-1152.
- Kleber, B., Veit, R., Moll, C.V., Gaser, C., Birbaumer, N., Lotze, M., 2016. Voxel-based morphometry in opera singers: Increased gray-matter volume in right somatosensory and auditory cortices. *NeuroImage* 133, 477-483.
- Kleber, B., Zarate, J.M., 2014. The Neuroscience of Singing. In: Graham, W., Nix, J. (Eds.), *The Oxford Handbook of Singing*. Oxford University Press, Oxford, UK.
- Kleber, B., Zeitouni, A.G., Friberg, A., Zatorre, R.J., 2013. Experience-dependent modulation of feedback integration during singing: role of the right anterior insula. *J Neurosci* 33, 6070-6080.
- Klein, C., Liem, F., Hanggi, J., Elmer, S., Jancke, L., 2016. The "silent" imprint of musical training. *Hum Brain Mapp* 37, 536-546.
- Klein, T.A., Ullsperger, M., Danielmeier, C., 2013. Error awareness and the insula: links to neurological and psychiatric diseases. *Front Hum Neurosci* 7, 14.
- Knolle, F., Schroger, E., Baess, P., Kotz, S.A., 2012. The cerebellum generates motor-to-auditory predictions: ERP lesion evidence. *J Cogn Neurosci* 24, 698-706.
- Kufahl, P.R., Li, Z., Risinger, R.C., Rainey, C.J., Wu, G., Bloom, A.S., Li, S.J., 2005. Neural responses to acute cocaine administration in the human brain detected by fMRI. *NeuroImage* 28, 904-914.
- Kumar, V., Croxson, P.L., Simonyan, K., 2016. Structural Organization of the Laryngeal Motor Cortical Network and Its Implication for Evolution of Speech Production. *J Neurosci* 36, 4170-4181.
- Kurth, F., Zilles, K., Fox, P.T., Laird, A.R., Eickhoff, S.B., 2010. A link between the systems: functional differentiation and integration within the human insula revealed by meta-analysis. *Brain Struct Funct* 214, 519-534.



- Leanderson, R., Sundberg, J., von Euler, C., 1987. Role of diaphragmatic activity during singing: a study of transdiaphragmatic pressures. *Journal of applied physiology* 62, 259-270.
- Liu, H., Qin, W., Li, W., Fan, L., Wang, J., Jiang, T., Yu, C., 2013. Connectivity-based parcellation of the human frontal pole with diffusion tensor imaging. *J Neurosci* 33, 6782-6790.
- Loucks, T.M., Poletto, C.J., Simonyan, K., Reynolds, C.L., Ludlow, C.L., 2007. Human brain activation during phonation and exhalation: common volitional control for two upper airway functions. *NeuroImage* 36, 131-143.
- Lu, Y., Paraskevopoulos, E., Herholz, S.C., Kuchenbuch, A., Pantev, C., 2014. Temporal processing of audiovisual stimuli is enhanced in musicians: evidence from magnetoencephalography (MEG). *PLoS ONE* 9, e90686.
- Luo, C., Guo, Z.W., Lai, Y.X., Liao, W., Liu, Q., Kendrick, K.M., Yao, D.Z., Li, H., 2012. Musical training induces functional plasticity in perceptual and motor networks: insights from resting-state fMRI. *PLoS ONE* 7, e36568.
- Luo, C., Tu, S., Peng, Y., Gao, S., Li, J., Dong, L., Li, G., Lai, Y., Li, H., Yao, D., 2014. Long-term effects of musical training and functional plasticity in salience system. *Neural Plast* 2014, 180138.
- Mathiak, K., Hertrich, I., Grodd, W., Ackermann, H., 2002. Cerebellum and speech perception: a functional magnetic resonance imaging study. *J Cogn Neurosci* 14, 902-912.
- Menon, V., Uddin, L.Q., 2010. Saliency, switching, attention and control: a network model of insula function. *Brain Struct Funct* 214, 655-667.
- Moberget, T., Ivry, R.B., 2016. Cerebellar contributions to motor control and language comprehension: searching for common computational principles. *Ann N Y Acad Sci* 1369, 154-171.
- Munte, T.F., Altenmüller, E., Jancke, L., 2002. The musician's brain as a model of neuroplasticity. *Nat Rev Neurosci* 3, 473-478.
- Mürbe, D., Pabst, F., Hofmann, G., Sundberg, J., 2004. Effects of a professional solo singer education on auditory and kinesthetic feedback--a longitudinal study of singers' pitch control. *Journal of Voice* 18, 236-241.
- Murphy, K., Birn, R.M., Handwerker, D.A., Jones, T.B., Bandettini, P.A., 2009. The impact of global signal regression on resting state correlations: are anti-correlated networks introduced? *NeuroImage* 44, 893-905.
- Nasir, S.M., Ostry, D.J., 2006. Somatosensory precision in speech production. *Curr Biol* 16, 1918-1923.
- Nelson, S.M., Dosenbach, N.U., Cohen, A.L., Wheeler, M.E., Schlaggar, B.L., Petersen, S.E., 2010. Role of the anterior insula in task-level control and focal attention. *Brain Struct Funct* 214, 669-680.
- Nieuwenhuys, R., 2012. The insular cortex: a review. *Progress in brain research* 195, 123-163.
- Nomi, J.S., Schettini, E., Broce, I., Dick, A.S., Uddin, L.Q., 2018. Structural Connections of Functionally Defined Human Insular Subdivisions. *Cereb Cortex* 28, 3445-3456.
- O'Reilly, J.X., Beckmann, C.F., Tomassini, V., Ramnani, N., Johansen-Berg, H., 2010. Distinct and overlapping functional zones in the cerebellum defined by resting state functional connectivity. *Cereb Cortex* 20, 953-965.
- Oh, A., Duerden, E.G., Pang, E.W., 2014. The role of the insula in speech and language processing. *Brain Lang* 135, 96-103.
- Olausson, H., Lamarre, Y., Backlund, H., Morin, C., Wallin, B.G., Starck, G., Ekholm, S., Strigo, I., Worsley, K., Vallbo, A.B., Bushnell, M.C., 2002. Unmyelinated tactile afferents signal touch and project to insular cortex. *Nat Neurosci* 5, 900-904.
- Pallesen, K.J., Brattico, E., Bailey, C.J., Korvenoja, A., Koivisto, J., Gjedde, A., Carlson, S., 2010. Cognitive control in auditory working memory is enhanced in musicians. *PLoS ONE* 5, e11120.

- Palomar-Garcia, M.A., Zatorre, R.J., Ventura-Campos, N., Bueicheku, E., Avila, C., 2017. Modulation of Functional Connectivity in Auditory-Motor Networks in Musicians Compared with Nonmusicians. *Cereb Cortex* 27, 2768-2778.
- Parkinson, A.L., Flagmeier, S.G., Manes, J.L., Larson, C.R., Rogers, B., Robin, D.A., 2012. Understanding the neural mechanisms involved in sensory control of voice production. *NeuroImage* 61, 314-322.
- Parrell, B., Lammert, A.C., Ciccarelli, G., Quatieri, T.F., 2017. Current Speech Motor Control Models: An Overview of Architectures & Properties. *bioRxiv*.
- Penhune, V.B., 2011. Sensitive periods in human development: evidence from musical training. *Cortex* 47, 1126-1137.
- Pfenning, A.R., Hara, E., Whitney, O., Rivas, M.V., Wang, R., Roulhac, P.L., Howard, J.T., Wirthlin, M., Lovell, P.V., Ganapathy, G., Mounccastle, J., Moseley, M.A., Thompson, J.W., Soderblom, E.J., Iriki, A., Kato, M., Gilbert, M.T., Zhang, G., Bakken, T., Bongaarts, A., Bernard, A., Lein, E., Mello, C.V., Hartemink, A.J., Jarvis, E.D., 2014. Convergent transcriptional specializations in the brains of humans and song-learning birds. *Science* 346, 1256846.
- Pisotta, I., Molinari, M., 2014. Cerebellar contribution to feedforward control of locomotion. *Front Hum Neurosci* 8, 475.
- Prevosto, V., Graf, W., Ugolini, G., 2011. Proprioceptive pathways to posterior parietal areas MIP and LIPv from the dorsal column nuclei and the postcentral somatosensory cortex. *Eur J Neurosci* 33, 444-460.
- Price, C.J., 2000. The anatomy of language: contributions from functional neuroimaging. *Journal of anatomy* 197 Pt 3, 335-359.
- Price, C.J., 2012. A review and synthesis of the first 20 years of PET and fMRI studies of heard speech, spoken language and reading. *NeuroImage* 62, 816-847.
- Pugnaghi, M., Meletti, S., Castana, L., Francione, S., Nobili, L., Mai, R., Tassi, L., 2011. Features of somatosensory manifestations induced by intracranial electrical stimulations of the human insula. *Clin Neurophysiol* 122, 2049-2058.
- Ray, K.L., Zald, D.H., Bludau, S., Riedel, M.C., Bzdok, D., Yanes, J., Falcone, K.E., Amunts, K., Fox, P.T., Eickhoff, S.B., Laird, A.R., 2015. Co-activation based parcellation of the human frontal pole. *NeuroImage* 123, 200-211.
- Remedios, R., Logothetis, N.K., Kayser, C., 2009. An auditory region in the primate insular cortex responding preferentially to vocal communication sounds. *J Neurosci* 29, 1034-1045.
- Riecker, A., Ackermann, H., Wildgruber, D., Dogil, G., Grodd, W., 2000. Opposite hemispheric lateralization effects during speaking and singing at motor cortex, insula and cerebellum. *NeuroReport* 11, 1997-2000.
- Riecker, A., Brendel, B., Ziegler, W., Erb, M., Ackermann, H., 2008. The influence of syllable onset complexity and syllable frequency on speech motor control. *Brain Lang* 107, 102-113.
- Riecker, A., Mathiak, K., Wildgruber, D., Erb, M., Hertrich, I., Grodd, W., Ackermann, H., 2005. fMRI reveals two distinct cerebral networks subserving speech motor control. *Neurology* 64, 700-706.
- Rodriguez-Fornells, A., Cunillera, T., Mestres-Misse, A., de Diego-Balaguer, R., 2009. Neurophysiological mechanisms involved in language learning in adults. *Philosophical transactions of the Royal Society of London* 364, 3711-3735.
- Sato, F., Uemura, Y., Kanno, C., Tsutsumi, Y., Tomita, A., Oka, A., Kato, T., Uchino, K., Murakami, J., Haque, T., Tachibana, Y., Yoshida, A., 2017. Thalamo-insular pathway conveying orofacial muscle proprioception in the rat. *Neuroscience* 365, 158-178.
- Schirmer-Mokwa, K.L., Fard, P.R., Zamorano, A.M., Finkel, S., Birbaumer, N., Kleber, B.A., 2015. Evidence for Enhanced Interoceptive Accuracy in Professional Musicians. *Front Behav Neurosci* 9, 349.
- Schlaug, G., 2015. Musicians and music making as a model for the study of brain plasticity. *Progress in brain research* 217, 37-55.

- Schomers, M.R., Pulvermuller, F., 2016. Is the Sensorimotor Cortex Relevant for Speech Perception and Understanding? An Integrative Review. *Front Hum Neurosci* 10, 435.
- Seeley, W.W., Menon, V., Schatzberg, A.F., Keller, J., Glover, G.H., Kenna, H., Reiss, A.L., Greicius, M.D., 2007. Dissociable intrinsic connectivity networks for salience processing and executive control. *J Neurosci* 27, 2349-2356.
- Segado, M., Hollinger, A., Thibodeau, J., Penhune, V., Zatorre, R.J., 2018. Partially Overlapping Brain Networks for Singing and Cello Playing. *Front Neurosci* 12, 351.
- Segerdahl, A.R., Mezue, M., Okell, T.W., Farrar, J.T., Tracey, I., 2015. The dorsal posterior insula subserves a fundamental role in human pain. *Nat Neurosci* 18, 499-500.
- Shadmehr, R., Smith, M.A., Krakauer, J.W., 2010. Error correction, sensory prediction, and adaptation in motor control. *Annu Rev Neurosci* 33, 89-108.
- Shum, M., Shiller, D.M., Baum, S.R., Gracco, V.L., 2011. Sensorimotor integration for speech motor learning involves the inferior parietal cortex. *Eur J Neurosci* 34, 1817-1822.
- Simmons, W.K., Avery, J.A., Barcalow, J.C., Bodurka, J., Drevets, W.C., Bellgowan, P., 2013. Keeping the body in mind: insula functional organization and functional connectivity integrate interoceptive, exteroceptive, and emotional awareness. *Hum Brain Mapp* 34, 2944-2958.
- Simonyan, K., Horwitz, B., 2011. Laryngeal motor cortex and control of speech in humans. *Neuroscientist* 17, 197-208.
- Simonyan, K., Saad, Z.S., Loucks, T.M., Poletto, C.J., Ludlow, C.L., 2007. Functional neuroanatomy of human voluntary cough and sniff production. *NeuroImage* 37, 401-409.
- Singer, T., Critchley, H.D., Preuschoff, K., 2009. A common role of insula in feelings, empathy and uncertainty. *Trends Cogn Sci* 13, 334-340.
- Skeide, M.A., Friederici, A.D., 2016. The ontogeny of the cortical language network. *Nat Rev Neurosci* 17, 323-332.
- Smith, A., 2006. Speech motor development: Integrating muscles, movements, and linguistic units. *J Commun Disord* 39, 331-349.
- Smith, S.M., Nichols, T.E., 2009. Threshold-free cluster enhancement: addressing problems of smoothing, threshold dependence and localisation in cluster inference. *NeuroImage* 44, 83-98.
- Smotherman, M., Schwartz, C., Metzner, W., 2010. Chapter 9.2 - Vocal-respiratory interactions in the parabrachial nucleus. In: Brudzynski, S.M. (Ed.), *Handbook of Behavioral Neuroscience*. Elsevier, pp. 383-392.
- Smotherman, M.S., 2007. Sensory feedback control of mammalian vocalizations. *Behav Brain Res* 182, 315-326.
- Song, X.W., Dong, Z.Y., Long, X.Y., Li, S.F., Zuo, X.N., Zhu, C.Z., He, Y., Yan, C.G., Zang, Y.F., 2011. REST: a toolkit for resting-state functional magnetic resonance imaging data processing. *PLoS ONE* 6, e25031.
- Stewart, L., Henson, R., Kampe, K., Walsh, V., Turner, R., Frith, U., 2003. Brain changes after learning to read and play music. *NeuroImage* 20, 71-83.
- Stoodley, C.J., Schmahmann, J.D., 2010. Evidence for topographic organization in the cerebellum of motor control versus cognitive and affective processing. *Cortex* 46, 831-844.
- Stoodley, C.J., Valera, E.M., Schmahmann, J.D., 2012. Functional topography of the cerebellum for motor and cognitive tasks: an fMRI study. *NeuroImage* 59, 1560-1570.
- Strait, D.L., Kraus, N., Parbery-Clark, A., Ashley, R., 2010. Musical experience shapes top-down auditory mechanisms: evidence from masking and auditory attention performance. *Hear Res* 261, 22-29.
- Strigo, I.A., Craig, A.D., 2016. Interoception, homeostatic emotions and sympathovagal balance. *Philosophical transactions of the Royal Society of London* 371.
- Tian, X., Poeppel, D., 2010. Mental imagery of speech and movement implicates the dynamics of internal forward models. *Front Psychol* 1, 166.
- Tremblay, S., Shiller, D.M., Ostry, D.J., 2003. Somatosensory basis of speech production. *Nature* 423, 866-869.



- Tsakiris, M., Hesse, M.D., Boy, C., Haggard, P., Fink, G.R., 2007. Neural signatures of body ownership: a sensory network for bodily self-consciousness. *Cereb Cortex* 17, 2235-2244.
- Tsutsumi, Y., Tachibana, Y., Sato, F., Furuta, T., Ohara, H., Tomita, A., Fujita, M., Moritani, M., Yoshida, A., 2018. Cortical and Subcortical Projections from Granular Insular Cortex Receiving Orofacial Proprioception. *Neuroscience* 388, 317-329.
- Uddin, L.Q., 2015. Salience processing and insular cortical function and dysfunction. *Nat Rev Neurosci* 16, 55-61.
- Uddin, L.Q., Kinnison, J., Pessoa, L., Anderson, M.L., 2014. Beyond the tripartite cognition-emotion-interoception model of the human insular cortex. *J Cogn Neurosci* 26, 16-27.
- Vahdat, S., Darainy, M., Milner, T.E., Ostry, D.J., 2011. Functionally specific changes in resting-state sensorimotor networks after motor learning. *J Neurosci* 31, 16907-16915.
- Ventura-Campos, N., Sanjuan, A., Gonzalez, J., Palomar-Garcia, M.A., Rodriguez-Pujadas, A., Sebastian-Galles, N., Deco, G., Avila, C., 2013. Spontaneous brain activity predicts learning ability of foreign sounds. *J Neurosci* 33, 9295-9305.
- Vias, C., Dick, A.S., 2017. Cerebellar Contributions to Language in Typical and Atypical Development: A Review. *Developmental neuropsychology* 42, 404-421.
- Vuust, P., Gebauer, L.K., Witek, M.A., 2014. Neural underpinnings of music: the polyrhythmic brain. *Advances in experimental medicine and biology* 829, 339-356.
- Wager, T.D., Lindquist, M., Kaplan, L., 2007. Meta-analysis of functional neuroimaging data: current and future directions. *Social cognitive and affective neuroscience* 2, 150-158.
- Watson, P.J., Hixon, T.J., 1985. Respiratory kinematics in classical (opera) singers. *J Speech Hear Res* 28, 104-122.
- Weiss-Croft, L.J., Baldeweg, T., 2015. Maturation of language networks in children: A systematic review of 22years of functional MRI. *NeuroImage* 123, 269-281.
- Woo, C.W., Krishnan, A., Wager, T.D., 2014. Cluster-extent based thresholding in fMRI analyses: pitfalls and recommendations. *NeuroImage* 91, 412-419.
- Wyke, B.D., 1974. Laryngeal neuromuscular control systems in singing. A review of current concepts. *Folia Phoniatr (Basel)* 26, 295-306.
- Yan, C.G., Wang, X.D., Zuo, X.N., Zang, Y.F., 2016. DPABI: Data Processing & Analysis for (Resting-State) Brain Imaging. *Neuroinformatics* 14, 339-351.
- Yoshida, A., Fujio, T., Sato, F., Ali, M.S.S., Haque, T., Ohara, H., Moritani, M., Kato, T., Dostrovsky, J.O., Tachibana, Y., 2017. Orofacial proprioceptive thalamus of the rat. *Brain Struct Funct* 222, 2655-2669.
- Zamorano, A.M., Cifre, I., Montoya, P., Riquelme, I., Kleber, B., 2017. Insula-based networks in professional musicians: Evidence for increased functional connectivity during resting state fMRI. *Hum Brain Mapp* 38, 4834-4849.
- Zamorano, A.M., Montoya, P., Cifre, I., Vuust, P., Riquelme, I., Kleber, B., 2019. Experience-dependent neuroplasticity in trained musicians modulates the effects of chronic pain on insula-based networks - A resting-state fMRI study. *NeuroImage* 202, 116103.
- Zamorano, A.M., Riquelme, I., Kleber, B., Altenmüller, E., Hatem, S.M., Montoya, P., 2014. Pain sensitivity and tactile spatial acuity are altered in healthy musicians as in chronic pain patients. *Front Hum Neurosci* 8, 1016.
- Zarate, J.M., 2013. The neural control of singing. *Front Hum Neurosci* 7, 237.
- Zarate, J.M., Zatorre, R.J., 2005. Neural substrates governing audiovocal integration for vocal pitch regulation in singing. *Ann N Y Acad Sci* 1060, 404-408.
- Zarate, J.M., Zatorre, R.J., 2008. Experience-dependent neural substrates involved in vocal pitch regulation during singing. *NeuroImage* 40, 1871-1887.
- Zatorre, R.J., 2013. Predispositions and plasticity in music and speech learning: neural correlates and implications. *Science* 342, 585-589.
- Zatorre, R.J., Baum, S.R., 2012. Musical melody and speech intonation: singing a different tune. *PLoS Biol* 10, e1001372.

Ziegler, W., Ackermann, H., 2017. Subcortical Contributions to Motor Speech: Phylogenetic, Developmental, Clinical. *Trends Neurosci* 40, 458-468.
